# Supplementary material for: Informed consent for total knee arthroplasty: exploration of patient`s information acquisition and decision-making processes—a qualitative study
Source: Springer Nature journal article supplement (doi:10.1186/s12913-023-09993-5), 2023-09-11
Supplement: MOESM1 [file 26028880]

## Additional file 1: COREQ Checklist

Tong, A., Sainsbury, P., & Craig, J. (2007). Consolidated criteria for reporting qualitative research (COREQ): a 32-item checklist for interviews and focus groups. *International journal for quality in health care*, 19(6), 349-357.

Table 1: COREQ

| No. Item                                       | Guide questions/description                                                                                                                      | Reported on page No. |
|------------------------------------------------|--------------------------------------------------------------------------------------------------------------------------------------------------|----------------------|
| <b>Domain 1: Research team and reflexivity</b> |                                                                                                                                                  |                      |
| Personal Characteristics                       |                                                                                                                                                  |                      |
| 1. Interviewer/facilitator                     | Which author/s conducted the interview or focus group?                                                                                           | 5                    |
| 2. Credentials                                 | What were the researcher's credentials? <i>E.g. PhD, MD</i>                                                                                      | -                    |
| 3. Occupation                                  | What was their occupation at the time of the study?                                                                                              | 1                    |
| 4. Gender                                      | Was the researcher male or female?                                                                                                               | 1                    |
| 5. Experience and training                     | What experience or training did the researcher have?                                                                                             | 5                    |
| Relationship with participants                 |                                                                                                                                                  |                      |
| 6. Relationship established                    | Was a relationship established prior to study commencement?                                                                                      | 5                    |
| 7. Participant knowledge of the interviewer    | What did the participants know about the researcher? <i>e.g. personal goals, reasons for doing the research</i>                                  | 5                    |
| 8. Interviewer characteristics                 | What characteristics were reported about the interviewer/facilitator? <i>e.g. Bias, assumptions, reasons and interests in the research topic</i> | 5                    |

Table 1: continued

| No. Item                                 | Guide questions/description                                                                                                                                     | Reported on page No. |
|------------------------------------------|-----------------------------------------------------------------------------------------------------------------------------------------------------------------|----------------------|
| <b>Domain 2: study design</b>            |                                                                                                                                                                 |                      |
| Theoretical framework                    |                                                                                                                                                                 |                      |
| 9. Methodological orientation and Theory | What methodological orientation was stated to underpin the study? <i>e.g. grounded theory, discourse analysis, ethnography, phenomenology, content analysis</i> | 4                    |
| Participant selection                    |                                                                                                                                                                 |                      |
| 10. Sampling                             | How were participants selected? <i>e.g. purposive, convenience, consecutive, snowball</i>                                                                       | 4                    |
| 11. Method of approach                   | How were participants approached? <i>e.g. face-to-face, telephone, mail, email</i>                                                                              | 4-5                  |
| 12. Sample size                          | How many participants were in the study?                                                                                                                        | 6                    |
| 13. Non-participation                    | How many people refused to participate or dropped out? Reasons?                                                                                                 | 6                    |
| Setting                                  |                                                                                                                                                                 |                      |
| 14. Setting of data collection           | Where was the data collected? <i>e.g. home, clinic, workplace</i>                                                                                               | 5                    |
| 15. Presence of non-participants         | Was anyone else present besides the participants and researchers?                                                                                               | 5                    |
| 16. Description of sample                | What are the important characteristics of the sample? <i>e.g. demographic data, date</i>                                                                        | 6-7                  |
| Data collection                          |                                                                                                                                                                 |                      |
| 17. Interview guide                      | Were questions, prompts, guides provided by the authors? Was it pilot tested?                                                                                   | 5                    |
| 18. Repeat interviews                    | Were repeat interviews carried out? If yes, how many?                                                                                                           | 5                    |
| 19. Audio/visual recording               | Did the research use audio or visual recording to collect the data?                                                                                             | 5                    |

Table 1: continued

| No. Item                               | Guide questions/description                                                                                                              | Reported on page No. |
|----------------------------------------|------------------------------------------------------------------------------------------------------------------------------------------|----------------------|
| 20. Field notes                        | Were field notes made during and/or after the interview or focus group?                                                                  | 5                    |
| 21. Duration                           | What was the duration of the interviews or focus group?                                                                                  | 7                    |
| 22. Data saturation                    | Was data saturation discussed?                                                                                                           | 7                    |
| 23. Transcripts returned               | Were transcripts returned to participants for comment and/or correction?                                                                 | 5                    |
| <b>Domain 3: analysis and findings</b> |                                                                                                                                          |                      |
| Data analysis                          |                                                                                                                                          |                      |
| 24. Number of data coders              | How many data coders coded the data?                                                                                                     | 5                    |
| 25. Description of the coding tree     | Did authors provide a description of the coding tree?                                                                                    | 5                    |
| 26. Derivation of themes               | Were themes identified in advance or derived from the data?                                                                              | 5-6                  |
| 27. Software                           | What software, if applicable, was used to manage the data?                                                                               | 6                    |
| 28. Participant checking               | Did participants provide feedback on the findings?                                                                                       | 6                    |
| Reporting                              |                                                                                                                                          |                      |
| 29. Quotations presented               | Were participant quotations presented to illustrate the themes / findings? Was each quotation identified? <i>e.g. participant number</i> | 9-20                 |
| 30. Data and findings consistent       | Was there consistency between the data presented and the findings?                                                                       | 9-20                 |
| 31. Clarity of major themes            | Were major themes clearly presented in the findings?                                                                                     | 9-20                 |
| 32. Clarity of minor themes            | Is there a description of diverse cases or discussion of minor themes?                                                                   | 9-20                 |
