# Supplementary material for: Informed consent for total knee arthroplasty: exploration of patient`s information acquisition and decision-making processes—a qualitative study
Source: Springer Nature journal article supplement (doi:10.1186/s12913-023-09993-5), 2023-09-11
Supplement: MOESM3 [file 26028880]

### **Additional file 3: Socio-demographics questionnaire**

#### **Patients**

Please provide the following information about yourself. These data are provided with a coding number. After the evaluation, it will no longer be possible to draw conclusions about your person from the coding number.

**1. Age:** \_\_\_\_\_ years old

#### **2. Gender:**

Female

Male

Diverse

#### **3. Highest educational qualification**

No school-leaving qualification

A-levels/Vocational baccalaureate/Matriculation

Secondary school-leaving certificate

Intermediate school-leaving certificate

Vocational training

Bachelor/Master craftsman/Business administrator

Master's diploma/State examination

PhD/Habilitation

Other: \_\_\_\_\_

#### **4. Occupational status**

Unemployed

Trainee, student

Full-time employed

Part-time employed

Retired

Other: \_\_\_\_\_

**5. Current or last occupation:** \_\_\_\_\_

#### **6. Membership of a support group for patients with knee osteoarthritis?**

Yes

No

**7. Date of diagnosis of knee arthrosis:** \_\_\_\_\_ (month/year)

**8. Date of surgery for total knee replacement**

Date of operation is not known

Operation is planned for: \_\_\_\_\_ (month/year)

Operation has been performed: \_\_\_\_\_ (month/year)

## Doctors

Please provide the following information about yourself. These data are provided with a coding number. After the evaluation, it will no longer be possible to draw conclusions about your person from the coding number.

1. Age: \_\_\_\_\_ years old

2. Gender:

Female

Male

Diverse

3. Highest educational qualification:

State examination

Medical doctor

Habilitation

other: \_\_\_\_\_

4. Specialist training:

Yes: \_\_\_\_\_

No

5. Field of activity

General practice

Specialist practice for orthopaedics

Hospital

Other: \_\_\_\_\_

6. Work experience: \_\_\_\_\_ (years)

7. How often do you see patients with knee osteoarthritis in your practice?

\_\_\_\_\_ per week

8. Advanced training in evidence-based medicine and/or shared decision-making

Yes: \_\_\_\_\_

No
