# Supplementary material for: Informed consent for total knee arthroplasty: exploration of patient`s information acquisition and decision-making processes—a qualitative study
Source: Springer Nature journal article supplement (doi:10.1186/s12913-023-09993-5), 2023-09-11
Supplement: MOESM4 [file 26028880]

## Additional file 4: Category scheme

Categories: Patients

Table 1: Patient categories

| Category                                             | Definition                                                                                                                                                                                                                                                                                                                                                                                                                                                                                                         |
|------------------------------------------------------|--------------------------------------------------------------------------------------------------------------------------------------------------------------------------------------------------------------------------------------------------------------------------------------------------------------------------------------------------------------------------------------------------------------------------------------------------------------------------------------------------------------------|
| <b>Information provision</b>                         |                                                                                                                                                                                                                                                                                                                                                                                                                                                                                                                    |
| Information provided at diagnosis                    | <ul style="list-style-type: none"> <li>• Contains statements about information that patients received at the time of diagnosis of gonarthrosis regarding:               <ul style="list-style-type: none"> <li>○ the aetiology, course and treatment of the condition</li> <li>○ format of the information</li> <li>○ procedure for providing the information</li> <li>○ importance of the information</li> <li>○ source of information (general practitioner / specialist)</li> </ul> </li> </ul>                 |
| Information provided on treatment options            | <ul style="list-style-type: none"> <li>• Contains statements about information that patients received during the treatment of gonarthrosis regarding:               <ul style="list-style-type: none"> <li>○ treatment options</li> <li>○ format of the information</li> <li>○ the process of providing information</li> <li>○ importance of the information</li> <li>○ source of information (general practitioner / specialist)</li> </ul> </li> </ul>                                                           |
| Information provided regarding TKA                   | <ul style="list-style-type: none"> <li>• Contains statements about information that patients received regarding knee replacement prior to informed consent:               <ul style="list-style-type: none"> <li>○ format of the information</li> <li>○ procedure for providing the information</li> <li>○ content regarding surgery</li> <li>○ content regarding anaesthesia</li> <li>○ importance of the information</li> <li>○ source of information (general practitioner / specialist)</li> </ul> </li> </ul> |
| Information provided in die informed consent process | <ul style="list-style-type: none"> <li>• Contains statements about information that patients received during the informed consent process regarding:               <ul style="list-style-type: none"> <li>○ format of the information</li> <li>○ procedure for providing the information</li> <li>○ content regarding the operation</li> <li>○ content regarding anaesthesia</li> <li>○ importance of the information</li> <li>○ differences in the information provided</li> </ul> </li> </ul>                    |

Table 1: continued

| Category                                          | Definition                                                                                                                                                                                                                                                                                                                                                                                                                                                                                                                                     |
|---------------------------------------------------|------------------------------------------------------------------------------------------------------------------------------------------------------------------------------------------------------------------------------------------------------------------------------------------------------------------------------------------------------------------------------------------------------------------------------------------------------------------------------------------------------------------------------------------------|
| <b>Information needs</b>                          |                                                                                                                                                                                                                                                                                                                                                                                                                                                                                                                                                |
| Information needs at diagnosis                    | <ul style="list-style-type: none"> <li>• Contains statements about information that patients would like to receive or expect regarding the aetiology, course and treatment of gonarthrosis:               <ul style="list-style-type: none"> <li>○ questions for the treating doctor</li> <li>○ missing information</li> <li>○ importance of the desired information</li> </ul> </li> </ul>                                                                                                                                                    |
| Information needs regarding treatment options     | <ul style="list-style-type: none"> <li>• Contains statements about information that patients would like or expect to receive regarding various treatment options (excluding TKA):               <ul style="list-style-type: none"> <li>○ questions for the treating doctor</li> <li>○ missing information</li> <li>○ importance of the desired information</li> </ul> </li> </ul>                                                                                                                                                              |
| Information needs regarding TKA                   | <ul style="list-style-type: none"> <li>• Contains statements about information that patients would like to receive or expect to receive regarding TKA prior to the informed consent process:               <ul style="list-style-type: none"> <li>○ questions for the treating doctor</li> <li>○ missing information</li> <li>○ importance of the desired information</li> </ul> </li> </ul>                                                                                                                                                   |
| Information needs in the informed consent process | <ul style="list-style-type: none"> <li>• Contains statements about information that the patients would like to receive or expect to receive during the informed consent process:               <ul style="list-style-type: none"> <li>○ questions for the treating doctor</li> <li>○ missing information</li> <li>○ importance of the desired information</li> </ul> </li> </ul>                                                                                                                                                               |
| <b>Information acquisition</b>                    |                                                                                                                                                                                                                                                                                                                                                                                                                                                                                                                                                |
| Information acquisition                           | <ul style="list-style-type: none"> <li>• Contains statements regarding patients' search for information on the aetiology, course and treatment (including TKA) of gonarthrosis:               <ul style="list-style-type: none"> <li>○ sources of information, e.g. internet, friends, relatives, professionals</li> <li>○ importance of the sources of information</li> <li>○ evaluation of the information found / received</li> <li>○ differences to the information provided by the doctors who treated the patient</li> </ul> </li> </ul> |

Table 1: continued

| Category                                                                                                 | Definition                                                                                                                                                                                                                                                                                                                                                                                                                                                                                                                                                                                                                     |
|----------------------------------------------------------------------------------------------------------|--------------------------------------------------------------------------------------------------------------------------------------------------------------------------------------------------------------------------------------------------------------------------------------------------------------------------------------------------------------------------------------------------------------------------------------------------------------------------------------------------------------------------------------------------------------------------------------------------------------------------------|
| <b>Treatment course from diagnosis to TKA</b>                                                            |                                                                                                                                                                                                                                                                                                                                                                                                                                                                                                                                                                                                                                |
| Treatment course                                                                                         | <ul style="list-style-type: none"> <li>• Contains statements describing the course of treatment from diagnosis to decision regarding knee replacement, including: <ul style="list-style-type: none"> <li>○ treatments carried out / refused</li> <li>○ course of treatment over time</li> <li>○ doctor's visits due to the gonarthrosis</li> </ul> </li> </ul>                                                                                                                                                                                                                                                                 |
| <b>Decision-making process</b>                                                                           |                                                                                                                                                                                                                                                                                                                                                                                                                                                                                                                                                                                                                                |
| Decisions for / against treatment options (excluding TKA)                                                | <ul style="list-style-type: none"> <li>• Contains statements about the process of deciding for or against treatment options (excluding TKA) with regard to: <ul style="list-style-type: none"> <li>○ factors influencing the decision</li> <li>○ persons involved in the decision</li> <li>○ involvement in the decision (Shared Decision-Making)</li> <li>○ course of the doctor-patient discussion</li> <li>○ expectations towards treating doctors</li> <li>○ value of the decision</li> <li>○ satisfaction with the decision-making process</li> <li>○ retrospective satisfaction with the decision</li> </ul> </li> </ul> |
| Decision for / against TKA                                                                               | <ul style="list-style-type: none"> <li>• Contains statements about the process of deciding for or against TKA regarding: <ul style="list-style-type: none"> <li>○ factors influencing the decision</li> <li>○ persons involved in the decision</li> <li>○ involvement in the decision (Shared Decision-Making)</li> <li>○ course of the doctor-patient discussion</li> <li>○ expectations towards treating doctors</li> <li>○ value of the decision</li> <li>○ satisfaction with the decision-making process</li> </ul> </li> </ul>                                                                                            |
| <b>Role of the informed consent process and the informed consent form in the decision-making process</b> |                                                                                                                                                                                                                                                                                                                                                                                                                                                                                                                                                                                                                                |
| Procedure of the informed consent process                                                                | <ul style="list-style-type: none"> <li>• Contains statements on the course of the informed consent process with regard to: <ul style="list-style-type: none"> <li>○ time of the informed consent process</li> <li>○ time at which the informed consent form was received</li> <li>○ implementation</li> <li>○ expectations / personal needs</li> </ul> </li> </ul>                                                                                                                                                                                                                                                             |
| Decision-making processes within the informed consent process                                            | <ul style="list-style-type: none"> <li>• Contains statements regarding decisions made during the informed consent process with regard to: <ul style="list-style-type: none"> <li>○ anaesthetic procedures</li> <li>○ alternative surgical options</li> <li>○ influence of the informed consent process / form</li> </ul> </li> </ul>                                                                                                                                                                                                                                                                                           |

## Categories: Outpatient doctors / clinician

Table 2: Outpatient doctors / clinicians' categories

| Category                                                                                                                        | Definition                                                                                                                                                                                                                                                                                                                                                                                                                                                                                                                                                                                                                                 |
|---------------------------------------------------------------------------------------------------------------------------------|--------------------------------------------------------------------------------------------------------------------------------------------------------------------------------------------------------------------------------------------------------------------------------------------------------------------------------------------------------------------------------------------------------------------------------------------------------------------------------------------------------------------------------------------------------------------------------------------------------------------------------------------|
| <b>Providing information from a doctor's perspective</b>                                                                        |                                                                                                                                                                                                                                                                                                                                                                                                                                                                                                                                                                                                                                            |
| Provision of information by outpatient doctors                                                                                  | <ul style="list-style-type: none"> <li>• Contains statements by doctors regarding their own provision of information to patients with regard to:               <ul style="list-style-type: none"> <li>○ content</li> <li>○ format of the information</li> <li>○ scope of the information</li> <li>○ the process of providing information</li> <li>○ dealing with patients who have already been informed</li> <li>○ assessment of own abilities</li> </ul> </li> </ul>                                                                                                                                                                     |
| Provision of information in the consultation and informed consent process from a clinical perspective                           | <ul style="list-style-type: none"> <li>• Contains statements of clinicians regarding their own information transfer to patients in the consultation and informed consent process (anaesthesia/TKA) with regard to:               <ul style="list-style-type: none"> <li>○ content</li> <li>○ format of the information</li> <li>○ scope of the information</li> <li>○ procedure of information transfer</li> <li>○ dealing with already informed patients</li> <li>○ assessment of own abilities</li> <li>○ inhibiting/encouraging characteristics of the informed consent process / the informed consent form used</li> </ul> </li> </ul> |
| <b>Decision-making processes from the doctor's perspective</b>                                                                  |                                                                                                                                                                                                                                                                                                                                                                                                                                                                                                                                                                                                                                            |
| Treatment options: Decision-making and inclusion of the patient perspective from the perspective of outpatient doctors.         | <ul style="list-style-type: none"> <li>• Contains statements from doctors regarding the decision-making process of patients in terms of:               <ul style="list-style-type: none"> <li>○ involvement in decision making</li> <li>○ inhibiting and facilitating factors for involvement in decision-making</li> <li>○ assessment of own abilities</li> </ul> </li> </ul>                                                                                                                                                                                                                                                             |
| TKA: Decision-making and inclusion of the patient perspective in the informed consent process from the clinician's perspective. | <ul style="list-style-type: none"> <li>• Contains statements from clinicians regarding the patient's decision-making process in terms of:               <ul style="list-style-type: none"> <li>○ decision-making options</li> <li>○ involvement in decision-making</li> <li>○ inhibiting and facilitating factors for inclusion in decision-making</li> <li>○ assessment of own abilities</li> </ul> </li> <li>• Importance of the informed consent process for the decision-making process</li> </ul>                                                                                                                                     |
